# Supplementary material for: OUP accepted manuscript
Source: Oxford University Press journal article supplement (doi:10.1093/database/baz157), 2020-01-01
Supplement: supplementary_file_1.pdf [file supplementary_file_1.pdf]

# iptmnetr\_use\_case

## Introduction

In this markdown, we re-analyze data from a published study on response of lung cancer cells to the tyrosine kinase inhibitor, erlotinib (PMID: 25404012). Erlotinib is used as a therapeutic agent in lung cancer patients who carry mutations in the epidermal growth factor receptor (EGFR). Patients initially respond well to the drug, but inevitably develop resistance. We focus on 243 phosphorylation sites in 194 proteins that were significantly upregulated by treatment with the EGFR ligand, epidermal growth factor (EGF), and downregulated by erlotinib. These sites are likely to be targets of EGFR-regulated pathways that are inhibited by drug treatment. We retrieve kinases for these sites from iPTMnet using iptmnetr and then compute some basic statistics on the results.

## Retrieving Kinase Information

In this part, we retrieve kinases from iPTMnet for the EGFR/erlotinib-regulated sites using iptmnetr, and write the table of kinase-site relationships to a file. The sites are listed in the file `egfr_sites_formatted.txt`. The input file has three tab-delimited columns: UniProtAC of the phosphorylated protein, amino acid residue of the phosphorylated site, and position of the phosphorylated site (e.g., P12345 S 100).

```
#Set working directory
setwd("~/Documents/Bioinformatics/PIR/Publications/iPTMnet_api/iptmnet_api2")
#Load iptmnetr package
library("iptmnetr", lib.loc="/Library/Frameworks/R.framework/Versions/3.5/Resources/Library")
kinase_info <- get_ptm_enzymes_from_file("Supplementary Data 1.txt")
write.table(kinase_info, file="Supplementary Data 2.txt", sep = '\t', quote = FALSE, col.names = NA)
head(kinase_info)
```

```
##   enz_name  enz_id  sub_name  sub_id      ptm_type  site  site_position  score
## 1   SGK1  000141   NDRG1  Q92597 Phosphorylation  S330           330      4
## 2   EEF2K  000418   EEF2K  000418 Phosphorylation  T353           353      4
## 3   CHEK1  014757   PRRC2B  Q5JSZ5 Phosphorylation  S166           166      1
## 4   CHEK1  014757   PROSER2  Q86WR7 Phosphorylation  S43            43      1
## 5   CHEK1  014757   RACGAP1  Q9H0H5 Phosphorylation  S203           203      1
## 6   CHEK1  014757   SENP2   Q9HC62 Phosphorylation  S344           344      1
##                                     source                                pmids
## 1  neXtProt,PSP,Signor                15461589,20416281
## 2  neXtProt,PSP,UniProt 22669845,22329831,22216903,23186163
## 3                                     PSP                                21851590
## 4                                     PSP                                21851590
## 5                                     PSP                                21851590
## 6                                     PSP                                21851590
```

## Basic Statistics

Next, we compute:

- Number of kinase-site pairs
- Number of sites with at least one kinase
- Number of kinases
- Number of sites per kinase
- Number of kinases that phosphorylate three or more sites

```
#Find number of kinase-site pairs
num_kinase_site_pairs <- nrow(kinase_info)
num_kinase_site_pairs
```

```
## [1] 118
```

```
#Find number of sites with at least one kinase
kinase_info$full_site <- paste(kinase_info$sub_id, kinase_info$site, sep = " ")
dup_sites <- duplicated(kinase_info$full_site)
num_unique_sites <- nrow(kinase_info[!dup_sites,])
num_unique_sites
```

```
## [1] 49
```

```
#Find number of unique kinases
num_unique_kinases <- nrow(kinase_info[!duplicated(kinase_info$enz_id),])
num_unique_kinases
```

```
## [1] 53
```

```
#Find number of sites per kinase (uses the plyr package)
library("plyr", lib.loc="/Library/Frameworks/R.framework/Versions/3.5/Resources/library")
kinase_tally <- count(kinase_info, "enz_name")
kinase_tally_sorted <- kinase_tally[order(-kinase_tally$freq),]
kinase_tally_sorted
```

| ##    | enz_name | freq |
|-------|----------|------|
| ## 35 | PRKCA    | 6    |
| ## 50 | RPS6KB1  | 6    |
| ## 20 | MAPK1    | 5    |
| ## 36 | PRKCD    | 5    |
| ## 46 | RPS6KA1  | 5    |
| ## 2  | AKT1     | 4    |
| ## 8  | CHEK1    | 4    |
| ## 11 | EGFR     | 4    |
| ## 18 | MAP2K2   | 4    |
| ## 34 | PRKACA   | 4    |
| ## 5  | AURKB    | 3    |
| ## 17 | MAP2K1   | 3    |
| ## 23 | MAPK3    | 3    |
| ## 33 | PLK1     | 3    |
| ## 37 | PRKCE    | 3    |
| ## 40 | PRKD1    | 3    |
| ## 47 | RPS6KA3  | 3    |
| ## 6  | BRAF     | 2    |
| ## 7  | CAMK2A   | 2    |
| ## 9  | CSNK2A1  | 2    |
| ## 13 | IKBKB    | 2    |
| ## 15 | JAK2     | 2    |
| ## 19 | MAP3K8   | 2    |
| ## 29 | PAK2     | 2    |
| ## 31 | PDPK1    | 2    |
| ## 38 | PRKCH    | 2    |
| ## 39 | PRKCZ    | 2    |
| ## 41 | PRKD3    | 2    |
| ## 44 | ROCK1    | 2    |
| ## 49 | RPS6KA5  | 2    |
| ## 52 | SRC      | 2    |
| ## 1  | ABL1     | 1    |
| ## 3  | AKT2     | 1    |
| ## 4  | AURKA    | 1    |
| ## 10 | EEF2K    | 1    |
| ## 12 | HCK      | 1    |
| ## 14 | INSR     | 1    |
| ## 16 | LCK      | 1    |
| ## 21 | MAPK13   | 1    |
| ## 22 | MAPK14   | 1    |
| ## 24 | MAPK8    | 1    |
| ## 25 | MAPKAPK5 | 1    |
| ## 26 | MKNK1    | 1    |
| ## 27 | MTOR     | 1    |
| ## 28 | PAK1     | 1    |
| ## 30 | PASK     | 1    |
| ## 32 | PKD1     | 1    |
| ## 42 | PTK6     | 1    |
| ## 43 | RET      | 1    |
| ## 45 | ROCK2    | 1    |
| ## 48 | RPS6KA4  | 1    |
| ## 51 | SGK1     | 1    |
| ## 53 | US3      | 1    |

```

#Find number of kinases that phosphorylate three or more sites
high_freq_kinases <- kinase_tally_sorted[ which(kinase_tally_sorted$freq >= 3),]
num_high_freq_kinases <- nrow(high_freq_kinases)
num_high_freq_kinases

```

```
## [1] 17
```
